# Supplementary material for: Orchard recycling improves climate change adaptation and mitigation potential of almond production systems
Source: PLoS One. 2020 Mar 27;15(3):e0229588. doi: 10.1371/journal.pone.0229588 (PMC7100960; doi:10.1371/journal.pone.0229588)
Supplement: S1 File — (XLSX) [file pone.0229588.s002.xlsx]

## Sheet: Hyprop
		VWC(%)				.volumetric water content
pF [-]	Tension (hPa)	Burn	Grind
-3	0.00101937	31.13	40.88
-2.98	0.00106741	31.13	40.88
-2.96	0.00111771	31.13	40.88
-2.94	0.00117039	31.13	40.88
-2.92	0.00122555	31.13	40.88
-2.9	0.00128331	31.13	40.88
-2.88	0.00134379	31.13	40.88
-2.86	0.00140712	31.13	40.88
-2.84	0.00147344	31.13	40.88
-2.82	0.00154288	31.13	40.88
-2.8	0.00161559	31.13	40.88
-2.78	0.00169173	31.13	40.88
-2.76	0.00177146	31.13	40.88
-2.739	0.00185922	31.13	40.88
-2.719	0.00194684	31.13	40.88
-2.699	0.0020386	31.13	40.88
-2.679	0.00213467	31.13	40.88
-2.659	0.00223528	31.13	40.88
-2.639	0.00234062	31.13	40.88
-2.619	0.00245093	31.13	40.88
-2.599	0.00256644	31.13	40.88
-2.579	0.00268739	31.13	40.88
-2.559	0.00281404	31.13	40.88
-2.539	0.00294667	31.13	40.88
-2.519	0.00308554	31.13	40.88
-2.499	0.00323096	31.13	40.88
-2.479	0.00338323	31.13	40.88
-2.459	0.00354267	31.13	40.88
-2.439	0.00370963	31.13	40.88
-2.419	0.00388446	31.13	40.88
-2.399	0.00406753	31.13	40.88
-2.379	0.00425923	31.13	40.88
-2.359	0.00445996	31.13	40.88
-2.339	0.00467015	31.13	40.88
-2.319	0.00489025	31.13	40.88
-2.299	0.00512072	31.13	40.88
-2.279	0.00536205	31.13	40.88
-2.259	0.00561476	31.13	40.88
-2.238	0.00589293	31.13	40.88
-2.218	0.00617065	31.13	40.88
-2.198	0.00646146	31.13	40.88
-2.178	0.00676598	31.13	40.88
-2.158	0.00708486	31.13	40.88
-2.138	0.00741875	31.13	40.88
-2.118	0.00776839	31.13	40.88
-2.098	0.0081345	31.13	40.88
-2.078	0.00851787	31.13	40.88
-2.058	0.0089193	31.13	40.88
-2.038	0.00933966	31.13	40.88
-2.018	0.00977982	31.13	40.88
-1.998	0.0102407	31.13	40.88
-1.978	0.0107234	31.13	40.88
-1.958	0.0112287	31.13	40.88
-1.938	0.0117579	31.13	40.88
-1.918	0.0123121	31.13	40.88
-1.898	0.0128923	31.13	40.88
-1.878	0.0134999	31.13	40.88
-1.858	0.0141361	31.13	40.88
-1.838	0.0148024	31.13	40.88
-1.818	0.0155	31.13	40.88
-1.798	0.0162305	31.13	40.88
-1.778	0.0169954	31.13	40.88
-1.758	0.0177964	31.13	40.88
-1.737	0.018678	31.13	40.88
-1.717	0.0195583	31.13	40.88
-1.697	0.02048	31.13	40.88
-1.677	0.0214452	31.13	40.88
-1.657	0.0224559	31.13	40.88
-1.637	0.0235142	31.13	40.88
-1.617	0.0246224	31.13	40.88
-1.597	0.0257829	31.13	40.88
-1.577	0.026998	31.13	40.88
-1.557	0.0282703	31.13	40.88
-1.537	0.0296027	31.13	40.88
-1.517	0.0309978	31.13	40.88
-1.497	0.0324587	31.13	40.88
-1.477	0.0339884	31.13	40.88
-1.457	0.0355902	31.13	40.88
-1.437	0.0372676	31.13	40.88
-1.417	0.0390239	31.13	40.88
-1.397	0.0408631	31.13	40.88
-1.377	0.0427889	31.13	40.88
-1.357	0.0448055	31.13	40.88
-1.337	0.0469171	31.13	40.88
-1.317	0.0491282	31.13	40.88
-1.297	0.0514436	31.13	40.88
-1.277	0.053868	31.13	40.88
-1.257	0.0564067	31.13	40.88
-1.236	0.0592013	31.13	40.88
-1.216	0.0619913	31.13	40.88
-1.196	0.0649129	31.13	40.88
-1.176	0.0679721	31.13	40.88
-1.156	0.0711756	31.13	40.88
-1.136	0.07453	31.13	40.88
-1.116	0.0780425	31.13	40.88
-1.096	0.0817205	31.13	40.88
-1.076	0.0855719	31.13	40.88
-1.056	0.0896047	31.13	40.88
-1.036	0.0938277	31.13	40.88
-1.016	0.0982496	31.13	40.88
-0.996	0.10288	31.13	40.88
-0.976	0.107729	31.13	40.88
-0.956	0.112806	31.13	40.88
-0.936	0.118122	31.13	40.88
-0.916	0.123689	31.13	40.88
-0.896	0.129518	31.13	40.88
-0.876	0.135622	31.13	40.88
-0.856	0.142014	31.13	40.88
-0.836	0.148707	31.13	40.88
-0.816	0.155715	31.13	40.88
-0.796	0.163054	31.13	40.88
-0.776	0.170738	31.13	40.88
-0.756	0.178785	31.13	40.88
-0.735	0.187642	31.13	40.88
-0.715	0.196486	31.13	40.88
-0.695	0.205746	31.13	40.88
-0.675	0.215442	31.13	40.88
-0.655	0.225596	31.13	40.88
-0.635	0.236228	31.13	40.88
-0.615	0.247361	31.13	40.88
-0.595	0.259019	31.13	40.88
-0.575	0.271226	31.13	40.88
-0.555	0.284008	31.13	40.88
-0.535	0.297393	31.13	40.88
-0.515	0.311409	31.13	40.88
-0.495	0.326085	31.13	40.88
-0.475	0.341453	31.13	40.88
-0.455	0.357545	31.13	40.88
-0.435	0.374396	31.13	40.88
-0.415	0.392041	31.13	40.88
-0.395	0.410517	31.13	40.88
-0.375	0.429864	31.13	40.88
-0.355	0.450123	31.13	40.88
-0.335	0.471336	31.13	40.88
-0.315	0.49355	31.13	40.88
-0.295	0.51681	31.13	40.88
-0.275	0.541167	31.13	40.88
-0.255	0.566671	31.13	40.88
-0.234	0.594745	31.13	40.88
-0.214	0.622775	31.13	40.87
-0.194	0.652125	31.13	40.87
-0.174	0.682859	31.13	40.87
-0.154	0.715041	31.13	40.87
-0.134	0.74874	31.13	40.87
-0.114	0.784027	31.13	40.87
-0.094	0.820977	31.13	40.87
-0.074	0.859668	31.13	40.87
-0.054	0.900183	31.13	40.87
-0.034	0.942608	31.13	40.87
-0.014	0.987031	31.13	40.87
0.006	1.03355	31.13	40.87
0.026	1.08226	31.13	40.87
0.046	1.13326	31.13	40.87
0.066	1.18667	31.13	40.87
0.086	1.2426	31.13	40.87
0.106	1.30116	31.13	40.86
0.126	1.36248	31.13	40.86
0.146	1.42669	31.13	40.86
0.166	1.49393	31.13	40.86
0.186	1.56434	31.13	40.86
0.206	1.63806	31.13	40.86
0.226	1.71526	31.13	40.86
0.246	1.7961	31.13	40.85
0.267	1.88509	31.13	40.85
0.287	1.97393	31.13	40.85
0.307	2.06695	31.13	40.85
0.327	2.16437	31.13	40.84
0.347	2.26637	31.13	40.84
0.367	2.37318	31.12	40.84
0.387	2.48503	31.12	40.84
0.407	2.60214	31.12	40.83
0.427	2.72478	31.12	40.83
0.447	2.85319	31.12	40.82
0.467	2.98766	31.12	40.82
0.487	3.12846	31.12	40.82
0.507	3.2759	31.12	40.81
0.527	3.43029	31.12	40.8
0.547	3.59196	31.12	40.8
0.567	3.76124	31.12	40.79
0.587	3.9385	31.12	40.79
0.607	4.12412	31.12	40.78
0.627	4.31848	31.12	40.77
0.647	4.522	31.12	40.76
0.667	4.73512	31.11	40.75
0.687	4.95828	31.11	40.74
0.707	5.19196	31.11	40.73
0.727	5.43665	31.11	40.72
0.747	5.69287	31.11	40.71
0.768	5.9749	31.11	40.69
0.788	6.25649	31.1	40.68
0.808	6.55135	31.1	40.66
0.828	6.86011	31.1	40.64
0.848	7.18342	31.09	40.62
0.868	7.52196	31.09	40.6
0.888	7.87646	31.09	40.58
0.908	8.24766	31.08	40.56
0.928	8.63637	31.08	40.53
0.948	9.04338	31.08	40.5
0.968	9.46959	31.07	40.47
0.988	9.91587	31.07	40.44
1.008	10.3832	31.06	40.41
1.028	10.8725	31.05	40.37
1.048	11.3849	31.05	40.33
1.068	11.9215	31.04	40.29
1.088	12.4833	31.03	40.24
1.108	13.0717	31.02	40.19
1.128	13.6877	31.01	40.14
1.148	14.3328	31	40.08
1.168	15.0083	30.99	40.01
1.188	15.7156	30.97	39.95
1.208	16.4563	30.96	39.88
1.228	17.2318	30.94	39.8
1.248	18.0439	30.92	39.71
1.269	18.9379	30.91	39.63
1.289	19.8304	30.88	39.53
1.309	20.765	30.86	39.43
1.329	21.7436	30.84	39.32
1.349	22.7683	30.81	39.2
1.369	23.8414	30.78	39.07
1.389	24.965	30.75	38.94
1.409	26.1415	30.71	38.8
1.429	27.3735	30.67	38.64
1.449	28.6636	30.63	38.48
1.469	30.0145	30.59	38.31
1.489	31.429	30.54	38.12
1.509	32.9102	30.48	37.93
1.529	34.4612	30.42	37.72
1.549	36.0854	30.36	37.5
1.569	37.786	30.29	37.27
1.589	39.5668	30.21	37.02
1.609	41.4315	30.13	36.76
1.629	43.3841	30.04	36.48
1.649	45.4288	29.95	36.2
1.669	47.5698	29.84	35.89
1.689	49.8117	29.73	35.57
1.709	52.1592	29.61	35.24
1.729	54.6174	29.47	34.89
1.749	57.1914	29.33	34.53
1.77	60.0248	29.18	34.15
1.79	62.8537	29.01	33.76
1.81	65.8159	28.83	33.35
1.83	68.9177	28.64	32.93
1.85	72.1657	28.44	32.49
1.87	75.5668	28.22	32.04
1.89	79.1281	27.99	31.58
1.91	82.8573	27.74	31.1
1.93	86.7623	27.47	30.62
1.95	90.8513	27.19	30.12
1.97	95.133	26.89	29.61
1.99	99.6164	26.58	29.09
2.01	104.311	26.25	28.57
2.03	109.227	25.9	28.04
2.05	114.375	25.53	27.5
2.07	119.765	25.15	26.95
2.09	125.41	24.75	26.4
2.11	131.32	24.33	25.85
2.13	137.509	23.9	25.3
2.15	143.99	23.45	24.75
2.17	150.776	22.99	24.19
2.19	157.881	22.52	23.64
2.21	165.322	22.03	23.09
2.23	173.114	21.53	22.54
2.251	181.69	21.03	21.99
2.271	190.253	20.51	21.45
2.291	199.219	19.99	20.91
2.311	208.608	19.46	20.38
2.331	218.439	18.93	19.86
2.351	228.734	18.4	19.34
2.371	239.514	17.87	18.83
2.391	250.802	17.33	18.33
2.411	262.622	16.8	17.83
2.431	274.999	16.27	17.34
2.451	287.959	15.75	16.87
2.471	301.53	15.23	16.4
2.491	315.741	14.72	15.94
2.511	330.621	14.21	15.49
2.531	346.203	13.72	15.05
2.551	362.519	13.23	14.62
2.571	379.604	12.76	14.2
2.591	397.494	12.29	13.79
2.611	416.228	11.84	13.39
2.631	435.844	11.39	13
2.651	456.385	10.96	12.62
2.671	477.893	10.54	12.24
2.691	500.416	10.13	11.88
2.711	524	9.74	11.53
2.731	548.695	9.36	11.19
2.752	575.879	8.99	10.85
2.772	603.019	8.63	10.53
2.792	631.438	8.28	10.21
2.812	661.197	7.95	9.9
2.832	692.358	7.62	9.6
2.852	724.988	7.31	9.31
2.872	759.156	7.01	9.03
2.892	794.934	6.73	8.75
2.912	832.398	6.45	8.49
2.932	871.628	6.18	8.23
2.952	912.706	5.92	7.98
2.972	955.721	5.68	7.73
2.992	1000.76	5.44	7.5
3.012	1047.93	5.21	7.27
3.032	1097.31	4.99	7.04
3.052	1149.03	4.78	6.83
3.072	1203.18	4.58	6.62
3.092	1259.89	4.39	6.41
3.112	1319.26	4.2	6.22
3.132	1381.44	4.02	6.02
3.152	1446.54	3.85	5.84
3.172	1514.72	3.69	5.66
3.192	1586.1	3.53	5.48
3.212	1660.85	3.38	5.31
3.232	1739.13	3.24	5.15
3.253	1825.29	3.1	4.99
3.273	1911.31	2.97	4.84
3.293	2001.39	2.84	4.69
3.313	2095.71	2.72	4.54
3.333	2194.48	2.6	4.4
3.353	2297.9	2.49	4.26
3.373	2406.2	2.38	4.13
3.393	2519.6	2.28	4
3.413	2638.34	2.18	3.88
3.433	2762.68	2.09	3.76
3.453	2892.88	2	3.64
3.473	3029.22	1.92	3.53
3.493	3171.98	1.83	3.42
3.513	3321.48	1.75	3.31
3.533	3478.01	1.68	3.21
3.553	3641.92	1.61	3.11
3.573	3813.56	1.54	3.01
3.593	3993.29	1.47	2.92
3.613	4181.49	1.41	2.83
3.633	4378.56	1.35	2.74
3.653	4584.91	1.29	2.66
3.673	4800.99	1.23	2.57
3.693	5027.26	1.18	2.49
3.713	5264.18	1.13	2.42
3.733	5512.28	1.08	2.34
3.754	5785.37	1.04	2.27
3.774	6058.02	0.99	2.2
3.794	6343.53	0.95	2.13
3.814	6642.49	0.91	2.06
3.834	6955.54	0.87	2
3.854	7283.35	0.83	1.94
3.874	7626.6	0.8	1.88
3.894	7986.03	0.76	1.82
3.914	8362.4	0.73	1.76
3.934	8756.51	0.7	1.71
3.954	9169.19	0.67	1.65
3.974	9601.32	0.64	1.6
3.994	10053.8	0.61	1.55
4.014	10527.6	0.58	1.5
4.034	11023.8	0.56	1.46
4.054	11543.3	0.54	1.41
4.074	12087.3	0.51	1.37
4.094	12657	0.49	1.33
4.114	13253.5	0.47	1.28
4.134	13878.1	0.45	1.24
4.154	14532.2	0.43	1.21
4.174	15217.1	0.41	1.17
4.194	15934.2	0.39	1.13
4.214	16685.2	0.38	1.1
4.234	17471.5	0.36	1.06
4.255	18337.1	0.34	1.03
4.275	19201.3	0.33	1
4.295	20106.2	0.32	0.97
4.315	21053.8	0.3	0.94
4.335	22046.1	0.29	0.91
4.355	23085.1	0.28	0.88
4.375	24173	0.26	0.85
4.395	25312.3	0.25	0.83
4.415	26505.2	0.24	0.8
4.435	27754.3	0.23	0.77
4.455	29062.4	0.22	0.75
4.475	30432	0.21	0.73
4.495	31866.3	0.2	0.7
4.515	33368.1	0.19	0.68
4.535	34940.7	0.19	0.66
4.555	36587.4	0.18	0.64
4.575	38311.7	0.17	0.62
4.595	40117.2	0.16	0.6
4.615	42007.9	0.16	0.58
4.635	43987.7	0.15	0.56
4.655	46060.7	0.14	0.55
4.675	48231.5	0.14	0.53
4.695	50504.6	0.13	0.51
4.715	52884.8	0.13	0.5
4.735	55377.2	0.12	0.48
4.756	58120.7	0.11	0.47
4.776	60859.9	0.11	0.45
4.796	63728.1	0.11	0.44
4.816	66731.5	0.1	0.42
4.836	69876.5	0.1	0.41
4.856	73169.7	0.09	0.4
4.876	76618	0.09	0.39
4.896	80228.9	0.08	0.37
4.916	84010	0.08	0.36
4.936	87969.3	0.08	0.35
4.956	92115.1	0.07	0.34
4.976	96456.4	0.07	0.33
4.996	101002	0.07	0.32
5.016	105762	0.06	0.31
5.036	110747	0.06	0.3
5.056	115966	0.06	0.29
5.076	121431	0.06	0.28
5.096	127154	0.05	0.27
5.116	133147	0.05	0.26
5.136	139422	0.05	0.26
5.156	145993	0.05	0.25
5.176	152873	0.05	0.24
5.196	160078	0.04	0.23
5.216	167622	0.04	0.23
5.236	175522	0.04	0.22
5.257	184218	0.04	0.21
5.277	192899	0.04	0.21
5.297	201991	0.03	0.2
5.317	211510	0.03	0.19
5.337	221478	0.03	0.19
5.357	231916	0.03	0.18
5.377	242846	0.03	0.18
5.397	254291	0.03	0.17
5.417	266275	0.03	0.16
5.437	278825	0.03	0.16
5.457	291965	0.02	0.15
5.477	305725	0.02	0.15
5.497	320133	0.02	0.15
5.517	335221	0.02	0.14
5.537	351019	0.02	0.14
5.557	367562	0.02	0.13
5.577	384885	0.02	0.13
5.597	403024	0.02	0.12
5.617	422018	0.02	0.12
5.637	441907	0.02	0.12
5.657	462734	0.02	0.11
5.677	484542	0.02	0.11
5.697	507377	0.01	0.11
5.717	531289	0.01	0.1
5.737	556328	0.01	0.1
5.758	583890	0.01	0.1
5.778	611408	0.01	0.09
5.798	640223	0.01	0.09
5.818	670395	0.01	0.09
5.838	701990	0.01	0.08
5.858	735074	0.01	0.08
5.878	769717	0.01	0.08
5.898	805992	0.01	0.08
5.918	843978	0.01	0.07
5.938	883753	0.01	0.07
5.958	925403	0.01	0.07
5.978	969016	0.01	0.07
5.998	1.01468e+06	0.01	0.07
6.018	1.06251e+06	0.01	0.06
6.038	1.11258e+06	0.01	0.06
6.058	1.16501e+06	0.01	0.06
6.078	1.21992e+06	0.01	0.06
6.098	1.27741e+06	0.01	0.06
6.118	1.33761e+06	0.01	0.05
6.138	1.40065e+06	0.01	0.05
6.158	1.46667e+06	0.01	0.05
6.178	1.53579e+06	0.01	0.05
6.198	1.60817e+06	0	0.05
6.218	1.68396e+06	0	0.05
6.238	1.76332e+06	0	0.05
6.259	1.85068e+06	0	0.04
6.279	1.9379e+06	0	0.04
6.299	2.02923e+06	0	0.04
6.319	2.12486e+06	0	0.04
6.339	2.22501e+06	0	0.04
6.359	2.32987e+06	0	0.04
6.379	2.43967e+06	0	0.04
6.399	2.55465e+06	0	0.03
6.419	2.67504e+06	0	0.03
6.439	2.80112e+06	0	0.03
6.459	2.93313e+06	0	0.03
6.479	3.07136e+06	0	0.03
6.499	3.21611e+06	0	0.03
6.519	3.36768e+06	0	0.03
6.539	3.5264e+06	0	0.03
6.559	3.69259e+06	0	0.03
6.579	3.86662e+06	0	0.03
6.599	4.04884e+06	0	0.03
6.619	4.23966e+06	0	0.02
6.639	4.43947e+06	0	0.02
6.659	4.64869e+06	0	0.02
6.679	4.86778e+06	0	0.02
6.699	5.09719e+06	0	0.02
6.719	5.33742e+06	0	0.02
6.739	5.58896e+06	0	0.02
6.76	5.86585e+06	0	0.02
6.78	6.1423e+06	0	0.02
6.8	6.43178e+06	0	0.02
6.82	6.7349e+06	0	0.02
6.84	7.0523e+06	0	0.02
6.86	7.38467e+06	0	0.02
6.88	7.7327e+06	0	0.02
6.9	8.09713e+06	0	0.02
6.92	8.47873e+06	0	0.02
6.94	8.87832e+06	0	0.01
6.96	9.29675e+06	0	0.01
6.98	9.73489e+06	0	0.01
7	1.01937e+07	0	0.01

## Sheet: bulk density
block	treatment	observation	Bulk Density		bulk density (g/cm3)
7	burn	2	1.50601
1	grind	1	1.52056
2	grind	2	1.5251
4	burn	1	1.52683
3	grind	1	1.53211
3	grind	1	1.53695
1	burn	2	1.54569
4	grind	2	1.54577
5	grind	2	1.55763
5	grind	1	1.55836
6	grind	2	1.58411
6	grind	1	1.58954
1	burn	1	1.60094
7	grind	1	1.6177
4	grind	1	1.62942
7	grind	1	1.63117
2	burn	1	1.64051
2	burn	2	1.64211
3	burn	2	1.66114
3	burn	2	1.66448
4	burn	2	1.67694
2	grind	1	1.69702
5	burn	2	1.69771
5	burn	2	1.69833
6	burn	1	1.7093
6	burn	2	1.71078
7	burn	1	1.7153
1	grind	2	1.73383

## Sheet: compaction
treatment	block	observation	resistance (Mpa)
burn	1	1	200
burn	1	2	250
burn	1	3	230
grind	1	1	225
grind	1	2	200
grind	1	3	105
burn	2	1	190
burn	2	2	140
burn	2	3	200
grind	2	1	175
grind	2	2	100
grind	2	3	150
burn	3	1	100
burn	3	2	200
burn	3	3	200
grind	3	1	265
grind	3	2	185
grind	3	3	200
grind	4	1	40
grind	4	2	190
grind	4	3	155
burn	4	1	160
burn	4	2	240
burn	4	3	235
grind	5	1	100
grind	5	2	100
grind	5	3	90
burn	5	1	160
burn	5	2	55
burn	5	3	100
grind	6	1	145
grind	6	2	50
grind	6	3	75
burn	6	1	90
burn	6	2	105
burn	6	3	250
grind	7	1	90
grind	7	2	50
grind	7	3	20
burn	7	1	50
burn	7	2	250
burn	7	3	50

## Sheet: infiltration
sample #	trt	block	Kfs (cm/s)		Hydraulic conductivity
1	burn	1	0.003
3	burn	2	0.000342
5	burn	3	0.00232
8	burn	4	0.00106
2	grind	1	0.00486
4	grind	2	0.00385
6	grind	3	0.00313
7	grind	4	0.00229

## Sheet: MWD
treatement	block	mean weight diameter
grind	1	609.643
grind	1	621.414
burn	1	519.255
burn	1	383.352
grind	2	747.062
grind	2	572.57
burn	2	558.357
burn	2	494.924
grind	3	798.334
grind	3	634.818
burn	3	426.289
burn	3	497.953

## Sheet: enzymes
sample #	block	obs	treatement	BG	CB	PHOS	LAP	NAG		measurement unit: micromol/g soil/h)
8	2	1	burn	133.994	5.26017	138.685	126.618	39.1375
10	3	1	burn	146.519	8.77431	121.715	102.44	17.7462
13	4	1	burn	197.416	82.426	132.897	205.158	70.979
19	5	1	burn	123.633	40.2041	103.226	109.258	37.8033
8	2	2	burn	114.71	30.7985	87.0869	93.1647	19.3323
10	3	2	burn	148.103	38.8566	113.271	110.673	25.6626
13	4	2	burn	207.822	75.6619	126.653	61.9522	77.2228
19	5	2	burn	132.036	42.6049	99.6248	-2.10785	45.606
8	2	3	burn	128.261	37.0527	88.1293	110.528	36.0104
10	3	3	burn	181.352	41.4954	119.604	114.319	25.1348
13	4	3	burn	215.107	85.5479	137.579	211.018	87.6291
19	5	3	burn	132.636	43.2052	105.027	96.6509	45.606
1	1	1	burn	151.179	4.38947	163.608	125.8	56.4759
1	1	2	burn	137.565	37.5354	119.216	96.9879	42.2705
1	1	3	burn	141.708	45.23	140.524	110.096	47.0057
2	1	1	burn	119.394	4.71226	136.519	117.291	39.4801
7	2	1	burn	132.543	-4.36549	148.815	104.659	52.8668
9	3	1	burn	139.063	-1.76164	90.035	63.384	22.2307
14	4	1	burn	147.724	51.3413	102.782	135.909	52.9657
20	5	1	burn	99.9945	30.0706	104.444	74.1061	16.7215
2	1	2	burn	118.875	30.1395	91.3725	93.3112	35.8477
7	2	2	burn	142.082	34.9116	119.638	85.0721	45.5725
9	3	2	burn	131.761	30.0543	105.682	96.2064	33.7053
14	4	2	burn	156.929	50.7998	108.196	118.308	50.7998
20	5	2	burn	110.801	28.1636	94.2734	70.3313	23.7139
2	1	3	burn	121.47	34.8098	100.713	124.625	37.9234
7	2	3	burn	125.249	31.545	118.516	100.224	54.5501
9	3	3	burn	137.498	34.7484	100.988	102.915	47.7877
14	4	3	burn	159.637	60.0049	104.947	143.098	67.5856
20	5	3	burn	117.158	34.5203	105.716	85.7736	22.4426
3	1	1	grind	290.167	20.947	210.158	151.034	93.8287
5	2	1	grind	384.637	46.2248	160.794	171.406	86.0139
12	3	1	grind	205.693	27.6779	99.1718	90.49	48.4682
16	4	1	grind	221.91	40.3437	101.91	91.6515	49.4667
18	5	1	grind	120.978	29.478	88.4657	63.6275	37.903
3	1	2	grind	162.71	41.2409	149.276	119.19	41.3033
5	2	2	grind	212.483	74.0139	139.343	148.457	73.3382
12	3	2	grind	124.446	32.3661	89.7955	94.3365	50.8122
16	4	2	grind	134.568	38.6175	91.5528	114.097	41.9868
18	5	2	grind	117.999	30.0738	66.4198	86.7786	37.903
3	1	3	grind	178.229	51.3878	197.623	152.608	89.6505
5	2	3	grind	190.057	71.0888	144.705	161.322	86.989
12	3	3	grind	117.414	30.608	89.2095	86.6436	50.2262
16	4	3	grind	134.568	45.5221	120.322	117.693	53.4944
18	5	3	grind	123.362	30.0738	67.6115	86.0397	40.2863
4	1	1	grind	238.062	-0.694232	184.226	96.8665	67.8564
6	2	1	grind	274.034	10.8087	146.439	121.255	65.6679
11	3	1	grind	237.351	72.0385	124.446	182.863	129.895
15	4	1	grind	236.16	35.4191	93.2634	98.6416	91.4049
17	5	1	grind	244.728	42.6425	83.6854	107.51	49.3806
4	1	2	grind	169.165	38.3257	180.268	104.813	59.3738
6	2	2	grind	165.354	42.275	117.685	102.613	53.7324
11	3	2	grind	251.644	93.4781	130.402	189.186	140.615
15	4	2	grind	156.044	39.0344	93.2634	107.994	86.5845
17	5	2	grind	149.464	50.0092	88.4211	150.257	53.5901
4	1	3	grind	169.165	39.4567	184.792	111.797	66.1599
6	2	3	grind	263.551	43.9025	119.856	117.781	56.4451
11	3	3	grind	251.644	84.5449	126.829	190.089	131.086
15	4	3	grind	148.814	40.842	99.8914	115.571	87.1871
17	5	3	grind	157.883	50.0092	88.4211	155.649	56.2211

## Sheet: SWP
block	irr	trt	row	tree	date	presure		Stem Water Potential (bar)
1	regular	burn	2	2	2017-04-24	8.06
1	regular	burn	2	2	2017-05-09	7.4
1	regular	burn	2	2	2017-05-24	6.5
1	regular	burn	2	2	2017-06-05	10
1	regular	burn	2	2	2017-06-12	11.5
1	regular	burn	2	2	2017-06-19	19
1	regular	burn	2	2	2017-06-26	21
1	regular	burn	2	2	2017-07-03	23.5
1	regular	burn	2	2	2017-07-10	27
1	regular	burn	2	2	2017-07-24	28.5
1	regular	burn	2	5	2017-04-24	7.46
1	regular	burn	2	5	2017-05-09	7.3
1	regular	burn	2	5	2017-05-24	7
1	regular	burn	2	5	2017-06-05	10
1	regular	burn	2	5	2017-06-12	9
1	regular	burn	2	5	2017-06-19	15.3
1	regular	burn	2	5	2017-06-26	18
1	regular	burn	2	5	2017-07-03	20.3
1	regular	burn	2	5	2017-07-10	24
1	regular	burn	2	5	2017-07-24	26.5
1	regular	grind	2	9	2017-04-24	9.1
1	regular	grind	2	9	2017-05-09	9.8
1	regular	grind	2	9	2017-05-24	9
1	regular	grind	2	9	2017-06-05	13.5
1	regular	grind	2	9	2017-06-12	11
1	regular	grind	2	9	2017-06-19	17.5
1	regular	grind	2	9	2017-06-26	19.5
1	regular	grind	2	9	2017-07-03	19.6
1	regular	grind	2	9	2017-07-10	23.5
1	regular	grind	2	9	2017-07-24	24.5
1	regular	grind	2	12	2017-04-24	7
1	regular	grind	2	12	2017-05-09	9.1
1	regular	grind	2	12	2017-05-24	7.1
1	regular	grind	2	12	2017-06-05	9.5
1	regular	grind	2	12	2017-06-12	7.5
1	regular	grind	2	12	2017-06-19	13.8
1	regular	grind	2	12	2017-06-26	15
1	regular	grind	2	12	2017-07-03	17.1
1	regular	grind	2	12	2017-07-10	22.3
1	regular	grind	2	12	2017-07-24	26
1	deficit	grind	5	2	2017-04-24	7.53
1	deficit	grind	5	2	2017-05-09	6.7
1	deficit	grind	5	2	2017-05-24	9.1
1	deficit	grind	5	2	2017-06-05	10
1	deficit	grind	5	2	2017-06-12	8.3
1	deficit	grind	5	2	2017-06-19	15.5
1	deficit	grind	5	2	2017-06-26	17.5
1	deficit	grind	5	2	2017-07-03	18.7
1	deficit	grind	5	2	2017-07-10	21.3
1	deficit	grind	5	2	2017-07-24	22
1	deficit	grind	5	5	2017-04-24	7.82
1	deficit	grind	5	5	2017-05-09	8.4
1	deficit	grind	5	5	2017-05-24	8.5
1	deficit	grind	5	5	2017-06-05	11
1	deficit	grind	5	5	2017-06-12	10
1	deficit	grind	5	5	2017-06-19	16.8
1	deficit	grind	5	5	2017-06-26	18.2
1	deficit	grind	5	5	2017-07-03	19.7
1	deficit	grind	5	5	2017-07-10	22.5
1	deficit	grind	5	5	2017-07-24	23
1	deficit	burn	5	9	2017-04-24	13.73
1	deficit	burn	5	9	2017-05-09	13.9
1	deficit	burn	5	9	2017-05-24	12.7
1	deficit	burn	5	9	2017-06-05	17
1	deficit	burn	5	9	2017-06-12	15.5
1	deficit	burn	5	9	2017-06-19	20
1	deficit	burn	5	9	2017-06-26	22.3
1	deficit	burn	5	9	2017-07-03	23.4
1	deficit	burn	5	9	2017-07-10	25.3
1	deficit	burn	5	9	2017-07-24	20.5
1	deficit	burn	5	12	2017-04-24	9.13
1	deficit	burn	5	12	2017-05-09	9.4
1	deficit	burn	5	12	2017-05-24	9.2
1	deficit	burn	5	12	2017-06-05	12
1	deficit	burn	5	12	2017-06-12	10
1	deficit	burn	5	12	2017-06-19	15.5
1	deficit	burn	5	12	2017-06-26	17
1	deficit	burn	5	12	2017-07-03	19.6
1	deficit	burn	5	12	2017-07-10	22.5
1	deficit	burn	5	12	2017-07-24	24.5
2	regular	burn	8	2	2017-04-24	6.96
2	regular	burn	8	2	2017-05-09	6.3
2	regular	burn	8	2	2017-05-24	8.9
2	regular	burn	8	2	2017-06-05	9.3
2	regular	burn	8	2	2017-06-12	7.8
2	regular	burn	8	2	2017-06-19	15.8
2	regular	burn	8	2	2017-06-26	15.6
2	regular	burn	8	2	2017-07-03	16.3
2	regular	burn	8	2	2017-07-10	20.3
2	regular	burn	8	2	2017-07-24	19.8
2	regular	burn	8	5	2017-04-24	7.05
2	regular	burn	8	5	2017-05-09	6.6
2	regular	burn	8	5	2017-05-24	7.6
2	regular	burn	8	5	2017-06-05	9.5
2	regular	burn	8	5	2017-06-12	8.3
2	regular	burn	8	5	2017-06-19	13.7
2	regular	burn	8	5	2017-06-26	15.8
2	regular	burn	8	5	2017-07-03	20.4
2	regular	burn	8	5	2017-07-10	24
2	regular	burn	8	5	2017-07-24	23.8
2	regular	grind	8	9	2017-04-24	4.5
2	regular	grind	8	9	2017-05-09	8.3
2	regular	grind	8	9	2017-05-24	8.8
2	regular	grind	8	9	2017-06-05	10.5
2	regular	grind	8	9	2017-06-12	9.5
2	regular	grind	8	9	2017-06-19	16.4
2	regular	grind	8	9	2017-06-26	17.5
2	regular	grind	8	9	2017-07-03	19
2	regular	grind	8	9	2017-07-10	23.5
2	regular	grind	8	9	2017-07-24	23.8
2	regular	grind	8	12	2017-04-24	7.6
2	regular	grind	8	12	2017-05-09	7.2
2	regular	grind	8	12	2017-05-24	7.3
2	regular	grind	8	12	2017-06-05	10
2	regular	grind	8	12	2017-06-12	8
2	regular	grind	8	12	2017-06-19	13
2	regular	grind	8	12	2017-06-26	15.6
2	regular	grind	8	12	2017-07-03	17.7
2	regular	grind	8	12	2017-07-10	22
2	regular	grind	8	12	2017-07-24	24.5
2	deficit	burn	11	2	2017-04-24	9.43
2	deficit	burn	11	2	2017-05-09	7.8
2	deficit	burn	11	2	2017-05-24	9.6
2	deficit	burn	11	2	2017-06-05	11.5
2	deficit	burn	11	2	2017-06-12	10
2	deficit	burn	11	2	2017-06-19	18.3
2	deficit	burn	11	2	2017-06-26	20.2
2	deficit	burn	11	2	2017-07-03	22.3
2	deficit	burn	11	2	2017-07-10	25.5
2	deficit	burn	11	2	2017-07-24	26.5
2	deficit	burn	11	5	2017-04-24	8.03
2	deficit	burn	11	5	2017-05-09	6.5
2	deficit	burn	11	5	2017-05-24	9.4
2	deficit	burn	11	5	2017-06-05	8.8
2	deficit	burn	11	5	2017-06-12	8.8
2	deficit	burn	11	5	2017-06-19	18.6
2	deficit	burn	11	5	2017-06-26	20.3
2	deficit	burn	11	5	2017-07-03	23.8
2	deficit	burn	11	5	2017-07-10	28
2	deficit	burn	11	5	2017-07-24	27.5
2	deficit	grind	11	9	2017-04-24	7.3
2	deficit	grind	11	9	2017-05-09	8.4
2	deficit	grind	11	9	2017-05-24	8.5
2	deficit	grind	11	9	2017-06-05	11
2	deficit	grind	11	9	2017-06-12	10
2	deficit	grind	11	9	2017-06-19	16.6
2	deficit	grind	11	9	2017-06-26	17.7
2	deficit	grind	11	9	2017-07-03	18.9
2	deficit	grind	11	9	2017-07-10	21.5
2	deficit	grind	11	9	2017-07-24	24.5
2	deficit	grind	11	12	2017-04-24	8.91
2	deficit	grind	11	12	2017-05-09	8.6
2	deficit	grind	11	12	2017-05-24	9.6
2	deficit	grind	11	12	2017-06-05	10.5
2	deficit	grind	11	12	2017-06-12	10.3
2	deficit	grind	11	12	2017-06-19	16.8
2	deficit	grind	11	12	2017-06-26	20.5
2	deficit	grind	11	12	2017-07-03	18.3
2	deficit	grind	11	12	2017-07-10	21.5
2	deficit	grind	11	12	2017-07-24	23.3
3	regular	grind	14	2	2017-04-24	8.41
3	regular	grind	14	2	2017-05-09	8.2
3	regular	grind	14	2	2017-05-24	11
3	regular	grind	14	2	2017-06-05	12.5
3	regular	grind	14	2	2017-06-12	12.3
3	regular	grind	14	2	2017-06-19	19.5
3	regular	grind	14	2	2017-06-26	20.3
3	regular	grind	14	2	2017-07-03	22.6
3	regular	grind	14	2	2017-07-10	26.5
3	regular	grind	14	2	2017-07-24	27.5
3	regular	grind	14	5	2017-04-24	8.37
3	regular	grind	14	5	2017-05-09	6.9
3	regular	grind	14	5	2017-05-24	10.2
3	regular	grind	14	5	2017-06-05	13
3	regular	grind	14	5	2017-06-12	11
3	regular	grind	14	5	2017-06-19	18.5
3	regular	grind	14	5	2017-06-26	20.2
3	regular	grind	14	5	2017-07-03	22.5
3	regular	grind	14	5	2017-07-10	27
3	regular	grind	14	5	2017-07-24	28.3
3	regular	burn	14	9	2017-04-24	7.56
3	regular	burn	14	9	2017-05-09	9.4
3	regular	burn	14	9	2017-05-24	9
3	regular	burn	14	9	2017-06-05	13
3	regular	burn	14	9	2017-06-12	12.5
3	regular	burn	14	9	2017-06-19	18.4
3	regular	burn	14	9	2017-06-26	21.5
3	regular	burn	14	9	2017-07-03	22.1
3	regular	burn	14	9	2017-07-10	26.5
3	regular	burn	14	9	2017-07-24	26.5
3	regular	burn	14	12	2017-04-24	10.9
3	regular	burn	14	12	2017-05-09	13
3	regular	burn	14	12	2017-05-24	17.5
3	regular	burn	14	12	2017-06-05	20
3	regular	burn	14	12	2017-06-12	18.8
3	regular	burn	14	12	2017-06-19	22.5
3	regular	burn	14	12	2017-06-26	23.7
3	regular	burn	14	12	2017-07-03	26.4
3	regular	burn	14	12	2017-07-10	29.5
3	regular	burn	14	12	2017-07-24	25.5
3	deficit	burn	17	2	2017-04-24	10.89
3	deficit	burn	17	2	2017-05-09	7.8
3	deficit	burn	17	2	2017-05-24	12.9
3	deficit	burn	17	2	2017-06-05	16.5
3	deficit	burn	17	2	2017-06-12	17
3	deficit	burn	17	2	2017-06-19	24.1
3	deficit	burn	17	2	2017-06-26	24.8
3	deficit	burn	17	2	2017-07-03	26.3
3	deficit	burn	17	2	2017-07-10	29.3
3	deficit	burn	17	2	2017-07-24	26
3	deficit	burn	17	5	2017-04-24	7.4
3	deficit	burn	17	5	2017-05-09	7.2
3	deficit	burn	17	5	2017-05-24	10.8
3	deficit	burn	17	5	2017-06-05	11.5
3	deficit	burn	17	5	2017-06-12	10
3	deficit	burn	17	5	2017-06-19	17.4
3	deficit	burn	17	5	2017-06-26	20.9
3	deficit	burn	17	5	2017-07-03	22.3
3	deficit	burn	17	5	2017-07-10	26.8
3	deficit	burn	17	5	2017-07-24	27.5
3	deficit	grind	17	9	2017-04-24	7
3	deficit	grind	17	9	2017-05-09	7.1
3	deficit	grind	17	9	2017-05-24	9.9
3	deficit	grind	17	9	2017-06-05	12.8
3	deficit	grind	17	9	2017-06-12	12
3	deficit	grind	17	9	2017-06-19	20.1
3	deficit	grind	17	9	2017-06-26	22.4
3	deficit	grind	17	9	2017-07-03	25
3	deficit	grind	17	9	2017-07-10	28.3
3	deficit	grind	17	9	2017-07-24	28.8
3	deficit	grind	17	12	2017-04-24	7.3
3	deficit	grind	17	12	2017-05-09	9.6
3	deficit	grind	17	12	2017-05-24	9
3	deficit	grind	17	12	2017-06-05	13.5
3	deficit	grind	17	12	2017-06-12	11.5
3	deficit	grind	17	12	2017-06-19	19.4
3	deficit	grind	17	12	2017-06-26	20.8
3	deficit	grind	17	12	2017-07-03	21.9
3	deficit	grind	17	12	2017-07-10	26
3	deficit	grind	17	12	2017-07-24	26
4	regular	grind	20	2	2017-04-24	7.07
4	regular	grind	20	2	2017-05-09	6
4	regular	grind	20	2	2017-05-24	8.3
4	regular	grind	20	2	2017-06-05	12
4	regular	grind	20	2	2017-06-12	10.5
4	regular	grind	20	2	2017-06-19	18.7
4	regular	grind	20	2	2017-06-26	19.8
4	regular	grind	20	2	2017-07-03	21.8
4	regular	grind	20	2	2017-07-10	25.5
4	regular	grind	20	2	2017-07-24	27
4	regular	grind	20	5	2017-04-24	7.65
4	regular	grind	20	5	2017-05-09	7.3
4	regular	grind	20	5	2017-05-24	9.2
4	regular	grind	20	5	2017-06-05	13
4	regular	grind	20	5	2017-06-12	13.5
4	regular	grind	20	5	2017-06-19	20.5
4	regular	grind	20	5	2017-06-26	23.5
4	regular	grind	20	5	2017-07-03	25.6
4	regular	grind	20	5	2017-07-10	29
4	regular	grind	20	5	2017-07-24	28.5
4	regular	burn	20	9	2017-04-24	8.6
4	regular	burn	20	9	2017-05-09	9.2
4	regular	burn	20	9	2017-05-24	9.7
4	regular	burn	20	9	2017-06-05	14.5
4	regular	burn	20	9	2017-06-12	14
4	regular	burn	20	9	2017-06-19	21
4	regular	burn	20	9	2017-06-26	22.7
4	regular	burn	20	9	2017-07-03	25.2
4	regular	burn	20	9	2017-07-10	28.5
4	regular	burn	20	9	2017-07-24	29.5
4	regular	burn	20	12	2017-04-24	5.33
4	regular	burn	20	12	2017-05-09	9.6
4	regular	burn	20	12	2017-05-24	9.9
4	regular	burn	20	12	2017-06-05	13
4	regular	burn	20	12	2017-06-12	12
4	regular	burn	20	12	2017-06-19	19.7
4	regular	burn	20	12	2017-06-26	22.4
4	regular	burn	20	12	2017-07-03	23.6
4	regular	burn	20	12	2017-07-10	28.5
4	regular	burn	20	12	2017-07-24	28.5
4	deficit	grind	23	2	2017-04-24	.
4	deficit	grind	23	2	2017-05-09	.
4	deficit	grind	23	2	2017-05-24	.
4	deficit	grind	23	2	2017-06-05	.
4	deficit	grind	23	2	2017-06-12	.
4	deficit	grind	23	2	2017-06-19	.
4	deficit	grind	23	2	2017-06-26	.
4	deficit	grind	23	2	2017-07-03	.
4	deficit	grind	23	2	2017-07-10	.
4	deficit	grind	23	2	2017-07-24	.
4	deficit	grind	23	5	2017-04-24	.
4	deficit	grind	23	5	2017-05-09	.
4	deficit	grind	23	5	2017-05-24	.
4	deficit	grind	23	5	2017-06-05	.
4	deficit	grind	23	5	2017-06-12	.
4	deficit	grind	23	5	2017-06-19	.
4	deficit	grind	23	5	2017-06-26	.
4	deficit	grind	23	5	2017-07-03	.
4	deficit	grind	23	5	2017-07-10	.
4	deficit	grind	23	5	2017-07-24	.
4	deficit	burn	23	9	2017-04-24	.
4	deficit	burn	23	9	2017-05-09	.
4	deficit	burn	23	9	2017-05-24	.
4	deficit	burn	23	9	2017-06-05	.
4	deficit	burn	23	9	2017-06-12	.
4	deficit	burn	23	9	2017-06-19	.
4	deficit	burn	23	9	2017-06-26	.
4	deficit	burn	23	9	2017-07-03	.
4	deficit	burn	23	9	2017-07-10	.
4	deficit	burn	23	9	2017-07-24	.
4	deficit	burn	23	12	2017-04-24	.
4	deficit	burn	23	12	2017-05-09	.
4	deficit	burn	23	12	2017-05-24	.
4	deficit	burn	23	12	2017-06-05	.
4	deficit	burn	23	12	2017-06-12	.
4	deficit	burn	23	12	2017-06-19	.
4	deficit	burn	23	12	2017-06-26	.
4	deficit	burn	23	12	2017-07-03	.
4	deficit	burn	23	12	2017-07-10	.
4	deficit	burn	23	12	2017-07-24	.

## Sheet: leaf nutrients
year	treatment	block	N	P	K	S	B	Ca	Mg	Zn	Mn	Fe	Cu	Cl	Na
2017	Grind	1	2.64	0.124	1.51	1750	29.2	3.77	1.088	11.6	29.3	181	4.8	289	0.15
2017	Grind	2	2.54	0.123	1.31	1850	28.9	4.26	1.086	12.4	23.1	195	4.6	301	0.09
2017	Grind	3	2.53	0.123	1.54	1750	28.2	3.92	1.051	12.3	28.7	170	4.5	151	0.1
2017	Grind	4	2.61	0.126	1.53	1910	29.3	3.67	1.049	13.5	32	215	4.2	465	0.12
2017	Grind	5	2.49	0.118	0.95	1760	26.3	4.1	1.132	11.8	28.6	261	3.9	324	0.09
2017	Grind	6	2.52	0.125	1.08	1760	28	3.62	1.069	14.3	31.8	204	4	637	0.14
2017	Grind	7	2.6	0.119	0.83	1870	24.9	4.44	1.19	13.1	30.8	191	3.9	370	0.1
2017	Burn	1	2.53	0.118	1.35	1700	29.1	4.2	1.102	14.5	24.7	178	5.5	176	0.1
2017	Burn	2	2.5	0.129	1.68	1820	30.2	3.65	0.996	11.6	21.4	220	4.3	397	0.14
2017	Burn	3	2.47	0.12	1.2	1790	29.1	4.52	1.11	13.5	27.5	265	4.7	217	0.07
2017	Burn	4	2.48	0.119	1.02	1830	26.5	4.31	1.147	13.7	27.1	289	4.3	342	0.09
2017	Burn	5	2.45	0.121	1.34	1700	27	3.49	0.963	12.1	32	180	3.6	669	0.14
2017	Burn	6	2.47	0.119	0.77	1710	25.2	4.18	1.141	12.4	25.3	175	3.7	344	0.09
2017	Burn	7	2.56	0.123	1.02	1830	26.9	3.97	1.166	17.5	31.6	238	4.7	793	0.15

## Sheet: C stock
treatment	depth	block	TC stock (t/ha)
burn	D1	1	5.80579
burn	D1	2	17.5898
burn	D1	3	18.405
burn	D1	4	1.56327
burn	D1	5	14.5544
burn	D1	6	20.2288
burn	D1	7	17.9222
burn	D2	1	11.7982
burn	D2	2	12.6368
burn	D2	3	15.205
burn	D2	4	7.32306
burn	D2	5	9.91589
burn	D2	6	6.75943
burn	D2	7	11.6812
burn	D3	1	2.32179
burn	D3	2	4.47467
burn	D3	3	5.52796
burn	D3	4	4.59007
burn	D3	5	4.40561
burn	D3	6	2.90476
burn	D3	7	3.99468
grind	D1	1	19.6314
grind	D1	2	20.0012
grind	D1	3	24.9237
grind	D1	4	19.9205
grind	D1	5	23.5937
grind	D1	6	22.9203
grind	D1	7	21.2426
grind	D2	1	31.8257
grind	D2	2	13.2051
grind	D2	3	10.1261
grind	D2	4	24.6093
grind	D2	5	6.95345
grind	D2	6	7.89724
grind	D2	7	6.79554
grind	D3	1	5.53158
grind	D3	2	4.31712
grind	D3	3	5.62175
grind	D3	4	7.27716
grind	D3	5	16.2755
grind	D3	6	2.14981
grind	D3	7	7.64588

## Sheet: nitrate and TN
plate reps	block	trt	NO3 ppm	TN ppm
1	1	burn	2.49539	4.9249
2	1	burn	2.61397	5.17391
3	1	burn	2.58762	5.11858
1	2	burn	2.20553	4.31621
2	2	burn	2.11331	4.12253
3	2	burn	2.44269	4.81423
1	3	burn	2.11331	4.12253
2	3	burn	2.50856	4.95257
3	3	burn	2.02108	3.92885
1	4	burn	2.29776	4.50988
2	4	burn	2.07378	4.03953
3	4	burn	1.94203	3.76285
1	5	burn	2.35046	4.62055
2	5	burn	2.70619	5.36759
3	5	burn	2.78524	5.5336
1	1	grind	2.82477	5.6166
2	1	grind	2.85112	5.67194
3	1	grind	2.79842	5.56126
1	2	grind	2.50856	4.95257
2	2	grind	2.54809	5.03557
3	2	grind	2.45586	4.8419
1	3	grind	1.99473	3.87352
2	3	grind	2.31094	4.53755
3	3	grind	2.25823	4.42688
1	4	grind	2.73254	5.42292
2	4	grind	2.41634	4.75889
3	4	grind	2.57444	5.09091
1	5	burn	2.40316	4.73123
2	5	burn	2.12648	4.1502
3	5	burn	2.23188	4.37154

[truncated: 12 more sheets: PAR, MBC, MBN, porometer, soil txt, yield, WUE, thermal imaging, soil mineral, Neutron probe, TC%, TC fraction]
